# Supplementary material
Source: Springer Nature journal article supplement (https://www.springermedizin.de/resource/supplementary/13024_2012_364_MOESM4_ESM.pdf/9643830)
Supplement: MOESM4 [file 9643830]

| <i>Gene ID</i> | <i>FOXF2</i> | <i>FOXO3A</i> | <i>IPF1</i> | <i>REST</i> | <i>PIT1</i> | <i>ARNT</i> |
|----------------|--------------|---------------|-------------|-------------|-------------|-------------|
| Bdnf           |              |               |             |             |             |             |
| Bmp4           |              |               |             |             |             |             |
| Gdnf           |              |               |             |             |             |             |
| Dll1           |              |               |             |             |             |             |
| Efnb1          |              |               |             |             |             |             |
| Tnr            |              |               |             |             |             |             |
| Nrg1           |              |               |             |             |             |             |
| Ntn1           |              |               |             |             |             |             |
| Inhba          |              |               |             |             |             |             |
| Pou3f3         |              |               |             |             |             |             |
| Bmp2           |              |               |             |             |             |             |
| Neurod1        |              |               |             |             |             |             |
| Ascl1          |              |               |             |             |             |             |
| Cdk5r1         |              |               |             |             |             |             |
| Drd2           |              |               |             |             |             |             |
| Apbb1          |              |               |             |             |             |             |
| Pax6           |              |               |             |             |             |             |
| Nog            |              |               |             |             |             |             |
| Fez1           |              |               |             |             |             |             |
| Rtn4           |              |               |             |             |             |             |
